# Supplementary material for: pH-Responsive Pickering emulsion stabilized by polymer-coated silica nanoaggregates and applied to recyclable interfacial catalysis
Source: Royal Society of Chemistry journal article supplement (doi:10.1039/d0ra07957j), 2020-01-01
Supplement: d0ra07957j1.pdf [file d0ra07957j1.pdf]

## Supporting Information

### **pH-Responsive Pickering emulsion stabilized by polymer-coated silica nanoaggregates and applied to recyclable interfacial catalysis**

Ruidong Luo, Jinfeng Dong, Yunbai Luo\*

Engineering Research Center of Organosilicon Compounds & Materials, Ministry of Education, College of

Chemistry and Molecular Sciences, Wuhan University, Wuhan 430072, PR China

Corresponding author: ybai@whu.edu.cn (Yunbai Luo)

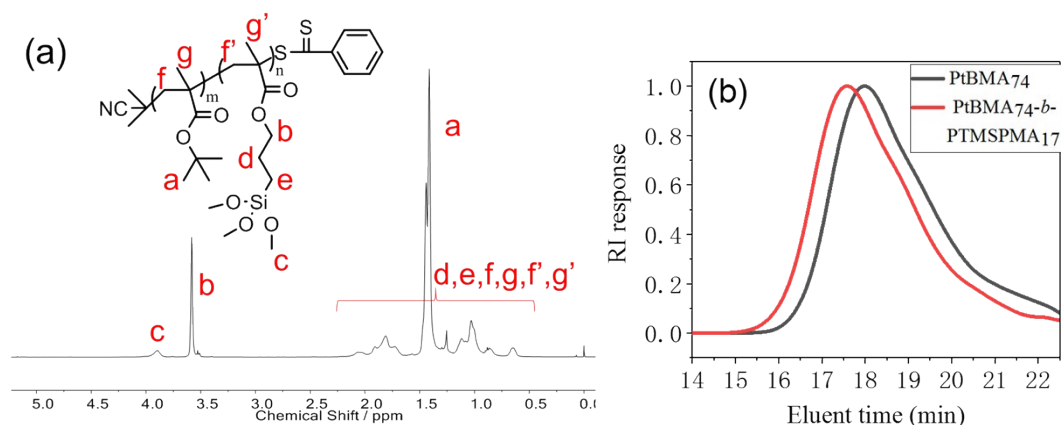

**Fig. S1** (a)  $^1\text{H}$  NMR ( $\text{CDCl}_3$ , 400 MHz) spectrum of PtBMA-*b*-PTMSPMA; (b) GPC results of PtBMA macro-CTA and PtBMA-*b*-PTMSPMA

PtBMA-*b*-PTMSPMA,  $^1\text{H}$  NMR ( $\delta$ ,  $\text{CDCl}_3$ ): 0.7–2.2 ( $\text{CH}_3\text{CCH}_2$  in backbone and  $\text{COOCH}_2\text{CH}_2\text{CH}_2\text{Si}(\text{OCH}_3)_3$  in TMSPMA unit), 1.35–1.50 ( $\text{COOC}(\text{CH}_3)_3$  in tBMA unit), 3.50–3.65 ( $\text{COOCH}_2\text{CH}_2\text{CH}_2\text{Si}(\text{OCH}_3)_3$  in TMSPMA unit), 3.80–4.10 ( $\text{COOCH}_2\text{CH}_2\text{CH}_2\text{Si}(\text{OCH}_3)_3$  in TMSPMA unit).

The polymerization degrees of the PtBMA and PTMSPMA segments calculated from the  $^1\text{H}$  NMR results were 74 and 17, respectively. From the GPC results, the  $M_w/M_n$  ratios of PtBMA macro-CTA and PtBMA<sub>74</sub>-*b*-PTMSPMA<sub>17</sub> were 1.09 and 1.13, respectively; the  $M_n$  of PtBMA-*b*-PTMSPMA was 16 500.

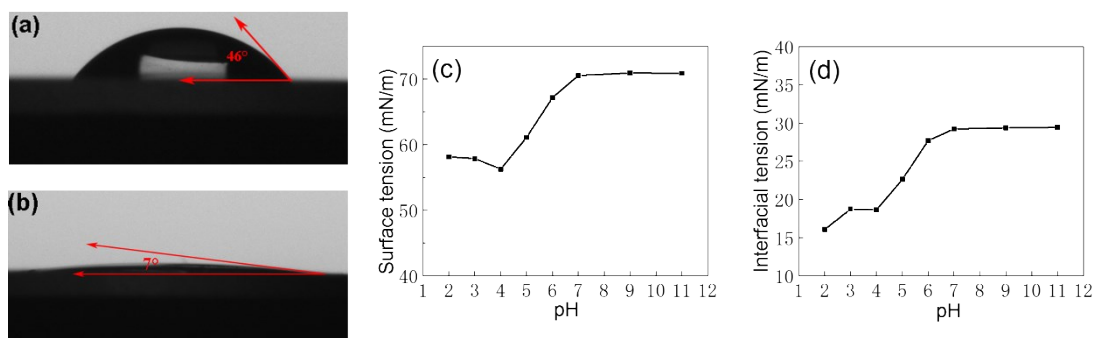

**Fig. S2** (a) Contact angle of P-Si, pH=3; (b) Contact angle of P-Si, pH=9; (c) SFT of P-Si aqueous dispersion (1.0 wt%); (d) IFT between P-Si aqueous dispersion (1.0 wt%) and toluene.

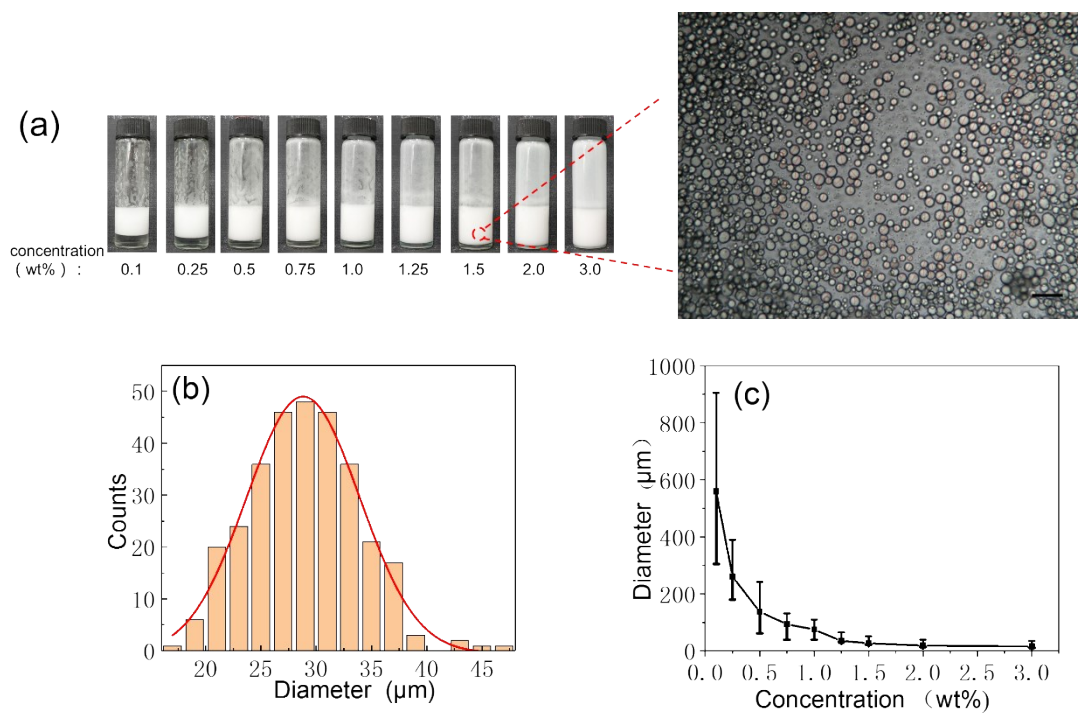

**Fig. S3** (a) Pickering emulsions prepared between a P-Si aqueous dispersion (different concentration, pH 3, 2 mL) and toluene (2 mL) and an image of the Pickering emulsion droplets (concentration of P-Si: **1.5 wt%**, scale bar: 100  $\mu\text{m}$ ); (b) corresponding distribution of Pickering emulsion droplet diameters; (c) relationship between the diameter of Pickering emulsion droplets and the concentration of P-Si.
